# Supplementary material for: Elucidation of Teicoplanin Interactions with Drug Targets Related to COVID-19
Source: MDPI journal article supplement (doi:10.3390/antibiotics10070856), 2021-07-15
Supplement: s1 [file s1]

## Supporting Information

### Elucidation of Teicoplanin Interactions with Drug Targets Related to COVID-19

Faizul Azam

*Department of Pharmaceutical Chemistry & Pharmacognosy, Unaizah College of Pharmacy, Qassim University, Saudi Arabia*

\*Corresponding author Tel +966-50-2728652; E-mail: faizulazam@gmail.com; f.azam@qu.edu.sa

**Table S1.** Intermolecular interactions observed in MM/GBSA optimized complexes of teicoplanin and 25 potential COVID-19 targets (AutoDock Vina 1.1.2 was used for molecular docking).

| Targets              | Hydrogen bonds |            |              | Hydrophobic/Electrostatic/Other |            |              |
|----------------------|----------------|------------|--------------|---------------------------------|------------|--------------|
|                      | Compound       | Amino acid | Distance (Å) | Type                            | Amino acid | Distance (Å) |
| Main protease        | H              | Pro168     | 2.05         | Alkyl                           | Leu141     | 4.97         |
|                      | H              | Ser46      | 2.21         | Alkyl                           | Pro168     | 4.85         |
|                      | H              | Gln189     | 2.67         | Alkyl                           | Leu50      | 4.26         |
|                      | O              | Met165     | 2.63         |                                 |            |              |
|                      | O              | Gly170     | 3.04         |                                 |            |              |
|                      | H              | Glu166     | 2.92         |                                 |            |              |
|                      | H              | Ser46      | 2.96         |                                 |            |              |
|                      | H              | Glu166     | 2.37         |                                 |            |              |
|                      | O              | Lys157     | 3.04         | $\pi$ -Lone Pair                | Tyr264     | 2.89         |
|                      | O              | Arg166     | 2.88         | Alkyl                           | Pro247     | 4.52         |
|                      | O              | Gln269     | 2.56         |                                 |            |              |
|                      | O              | Tyr273     | 2.17         |                                 |            |              |
|                      | H              | Tyr268     | 2.84         |                                 |            |              |
|                      | H              | Leu162     | 2.26         |                                 |            |              |
|                      | H              | Thr301     | 1.78         |                                 |            |              |
|                      | H              | Glu161     | 1.90         |                                 |            |              |
|                      | H              | Thr301     | 2.56         |                                 |            |              |
| Papain-like protease | O              | Gly163     | 2.60         |                                 |            |              |
|                      | O              | Arg166     | 2.70         |                                 |            |              |
|                      | O              | Tyr268     | 2.32         |                                 |            |              |
|                      | H              | Tyr268     | 3.04         |                                 |            |              |
|                      | H              | Gln269     | 2.45         |                                 |            |              |
|                      | H              | Asp164     | 2.22         |                                 |            |              |
|                      | H              | Asp164     | 2.46         |                                 |            |              |
|                      | H              | Tyr268     | 2.79         |                                 |            |              |
|                      | H              | Thr301     | 2.42         |                                 |            |              |
|                      | H              | Ala246     | 2.78         |                                 |            |              |
|                      | H              | Tyr264     | 2.91         |                                 |            |              |
|                      | H              | Tyr268     | 2.69         |                                 |            |              |

|                 |    |        |      |              |        |      |
|-----------------|----|--------|------|--------------|--------|------|
| RdRp (RTP site) | O  | Hie439 | 2.82 | Alkyl        | Ala547 | 4.18 |
|                 | O  | Ile548 | 2.47 | Alkyl        | Arg555 | 4.94 |
|                 | O  | Lys551 | 2.51 | Alkyl        | Val557 | 4.89 |
|                 | O  | Lys551 | 3.02 | Alkyl        | Lys551 | 3.92 |
|                 | O  | Lys551 | 2.07 | Alkyl        | Arg555 | 3.68 |
|                 | O  | Arg553 | 2.84 | Alkyl        | Val557 | 5.48 |
|                 | O  | Asn691 | 2.08 |              |        |      |
|                 | H  | Glu811 | 2.71 |              |        |      |
|                 | H  | U20    | 2.09 |              |        |      |
|                 | HO | Asp845 | 2.89 |              |        |      |
|                 | H  | U20    | 1.78 |              |        |      |
|                 | H  | Asp760 | 2.12 |              |        |      |
|                 | H  | A19    | 2.12 |              |        |      |
|                 | H  | His816 | 2.93 |              |        |      |
|                 | H  | A19    | 2.57 |              |        |      |
|                 | H  | Ser814 | 1.76 |              |        |      |
|                 | O  | Hie439 | 2.21 |              |        |      |
|                 | O  | Ala547 | 2.43 |              |        |      |
|                 | O  | Lys551 | 2.58 |              |        |      |
|                 | O  | Lys798 | 2.86 |              |        |      |
|                 | O  | U20    | 2.53 |              |        |      |
|                 | O  | A11    | 2.80 |              |        |      |
|                 | H  | Asp760 | 2.91 |              |        |      |
|                 | H  | A19    | 2.61 |              |        |      |
|                 | H  | A19    | 2.86 |              |        |      |
|                 | H  | Asp618 | 2.21 |              |        |      |
|                 | H  | Asp833 | 2.30 |              |        |      |
|                 | H  | U20    | 2.74 |              |        |      |
|                 | H  | A19    | 2.76 |              |        |      |
|                 | H  | U18    | 2.56 |              |        |      |
|                 | H  | Tyr619 | 2.29 |              |        |      |
|                 | H  | Ser814 | 2.36 |              |        |      |
|                 | H  | Tyr619 | 2.37 |              |        |      |
| RdRp (RNA site) | O  | Asn496 | 2.08 | Alkyl        | Lys500 | 4.09 |
|                 | O  | Lys500 | 2.90 | Alkyl        | Lys593 | 4.07 |
|                 | O  | Lys545 | 2.59 | $\pi$ -Alkyl | Phe594 | 5.23 |
|                 | O  | Lys545 | 2.75 |              |        |      |
|                 | O  | Thr565 | 2.65 |              |        |      |
|                 | O  | Arg569 | 2.39 |              |        |      |
|                 | O  | Ser592 | 2.10 |              |        |      |
|                 | H  | Asp865 | 2.80 |              |        |      |
|                 | HO | Gly683 | 1.88 |              |        |      |
|                 | H  | Asp684 | 1.89 |              |        |      |
|                 | H  | Tyr546 | 1.70 |              |        |      |
|                 | H  | Ser501 | 1.87 |              |        |      |
|                 | H  | Tyr689 | 1.89 |              |        |      |
|                 | O  | Lys545 | 3.05 |              |        |      |
|                 | O  | Lys545 | 2.71 |              |        |      |
|                 | O  | Ala547 | 2.90 |              |        |      |
|                 | O  | Ser592 | 2.64 |              |        |      |
|                 | O  | Gly683 | 2.96 |              |        |      |

|                                |    |         |      |              |        |      |
|--------------------------------|----|---------|------|--------------|--------|------|
| Spike protein (RBD)            | H  | Ala685  | 2.80 |              |        |      |
|                                | H  | Tyr546  | 3.00 |              |        |      |
|                                | O  | Tyr453  | 1.94 | -            | -      | -    |
|                                | O  | Gln493  | 2.11 |              |        |      |
|                                | O  | Gln493  | 2.37 |              |        |      |
|                                | HO | Glu484  | 2.10 |              |        |      |
|                                | H  | Gly485  | 1.84 |              |        |      |
|                                | H  | Gln493  | 2.23 |              |        |      |
|                                | H  | Ser494  | 2.85 |              |        |      |
|                                | H  | Gly496  | 1.81 |              |        |      |
|                                | O  | Arg403  | 2.49 |              |        |      |
|                                | H  | Gln493  | 2.85 |              |        |      |
|                                | O  | Tyr453  | 1.72 | $\pi$ -Alkyl | Tyr489 | 4.30 |
|                                | O  | Gly496  | 1.69 | $\pi$ -Alkyl | Tyr505 | 4.70 |
| Spike monomer                  | O  | Gln498  | 2.07 |              |        |      |
|                                | O  | Tyr505  | 2.14 |              |        |      |
|                                | H  | Asn501  | 1.73 |              |        |      |
|                                | H  | Thr500  | 1.85 |              |        |      |
|                                | O  | Tyr495  | 2.66 |              |        |      |
|                                | H  | Asp405  | 2.57 |              |        |      |
|                                | H  | Tyr505  | 2.81 |              |        |      |
|                                | O  | Tyr170  | 2.01 | Alkyl        | Pro330 | 5.26 |
|                                | H  | Arg357  | 1.93 | Alkyl        | Ile332 | 5.27 |
|                                | H  | Glu340  | 2.11 | $\pi$ -Alkyl | Phe168 | 4.54 |
|                                | H  | Leu335  | 1.68 |              |        |      |
|                                | H  | Glu169  | 2.68 |              |        |      |
|                                | H  | Glu340  | 2.19 |              |        |      |
|                                | O  | Pro337  | 3.01 |              |        |      |
| Spike trimer                   | H  | Leu335  | 2.99 |              |        |      |
|                                | H  | Asn360  | 2.95 |              |        |      |
|                                | H  | Glu340  | 2.43 |              |        |      |
|                                | H  | Leu335  | 2.72 |              |        |      |
|                                | H  | Leu335  | 2.65 |              |        |      |
|                                | H  | Asp979  | 2.56 | Alkyl        | Ala972 | 4.79 |
|                                | H  | Ser968  | 1.95 |              |        |      |
|                                | H  | Asp1163 | 2.81 |              |        |      |
|                                | H  | Asp1165 | 1.91 |              |        |      |
|                                | H  | Asn978  | 2.22 |              |        |      |
|                                | H  | Ser975  | 2.55 |              |        |      |
|                                | H  | Ser968  | 2.72 |              |        |      |
|                                | O  | Gln35   | 2.12 | -            | -      | -    |
|                                | O  | Lys115  | 2.05 |              |        |      |
| S2 protein (post fusion state) | O  | Gln35   | 2.16 |              |        |      |
|                                | O  | Gln35   | 2.37 |              |        |      |
|                                | O  | Arg73   | 2.16 |              |        |      |
|                                | O  | Arg73   | 2.83 |              |        |      |
|                                | O  | Val78   | 2.94 |              |        |      |
|                                | H  | Glu77   | 1.71 |              |        |      |
|                                | H  | Met76   | 1.83 |              |        |      |
|                                | O  | Gly75   | 2.81 |              |        |      |
|                                | H  | Pro33   | 3.00 |              |        |      |
|                                | O  | Leu5    | 2.13 | Alkyl        | Met3   | 5.17 |
|                                |    |         |      |              |        |      |
|                                |    |         |      |              |        |      |
|                                |    |         |      |              |        |      |
|                                |    |         |      |              |        |      |
| N-protein (C domain)           |    |         |      |              |        |      |
|                                |    |         |      |              |        |      |
|                                |    |         |      |              |        |      |
|                                |    |         |      |              |        |      |
|                                |    |         |      |              |        |      |
|                                |    |         |      |              |        |      |
|                                |    |         |      |              |        |      |
|                                |    |         |      |              |        |      |
|                                |    |         |      |              |        |      |
|                                |    |         |      |              |        |      |
|                                |    |         |      |              |        |      |
|                                |    |         |      |              |        |      |
|                                |    |         |      |              |        |      |
|                                |    |         |      |              |        |      |
| N-protein (N domain)           |    |         |      |              |        |      |
|                                |    |         |      |              |        |      |

|                 |    |        |      |       |        |      |
|-----------------|----|--------|------|-------|--------|------|
| Nsp3 (AMP site) | O  | Ser11  | 2.49 | Alkyl | Pro111 | 5.22 |
|                 | O  | Arg48  | 2.89 |       |        |      |
|                 | O  | Tyr69  | 2.39 |       |        |      |
|                 | O  | Arg109 | 1.88 |       |        |      |
|                 | H  | Asn8   | 1.66 |       |        |      |
|                 | H  | Asn114 | 2.72 |       |        |      |
|                 | H  | Pro111 | 2.76 |       |        |      |
|                 | H  | Asn7   | 1.94 |       |        |      |
|                 | O  | Ala10  | 3.08 |       |        |      |
|                 | H  | Tyr71  | 2.38 |       |        |      |
|                 | H  | Pro111 | 2.82 |       |        |      |
|                 | H  | Leu5   | 2.64 |       |        |      |
|                 | H  | Leu5   | 2.52 |       |        |      |
|                 | H  | Asn7   | 2.56 |       |        |      |
|                 | O  | Gly48  | 2.93 | Alkyl | Ala38  | 3.76 |
|                 | O  | Lys163 | 2.73 | Alkyl | Val49  | 4.21 |
|                 | O  | Lys163 | 2.76 | Alkyl | Pro125 | 5.02 |
|                 | H  | Asp22  | 1.79 |       |        |      |
|                 | H  | Asn101 | 1.77 |       |        |      |
|                 | H  | Gly48  | 2.48 |       |        |      |
|                 | H  | Asp22  | 2.10 |       |        |      |
|                 | H  | Asp157 | 1.90 |       |        |      |
|                 | O  | Gly47  | 2.45 |       |        |      |
|                 | O  | Gly47  | 2.64 |       |        |      |
|                 | O  | Gly48  | 2.63 |       |        |      |
|                 | O  | Val49  | 2.27 |       |        |      |
|                 | O  | Gly133 | 2.76 |       |        |      |
|                 | H  | Gly130 | 2.73 |       |        |      |
|                 | H  | Asp157 | 2.56 |       |        |      |
|                 | H  | Gly46  | 2.52 |       |        |      |
|                 | H  | Asp157 | 3.06 |       |        |      |
|                 | H  | Asp22  | 2.68 |       |        |      |
|                 | H  | Asp22  | 2.86 |       |        |      |
| Nsp3 (MES site) | O  | Asn40  | 2.94 | Alkyl | Val155 | 4.41 |
|                 | O  | Gly48  | 2.81 | Alkyl | Ile131 | 4.05 |
|                 | HO | Gly46  | 1.71 |       |        |      |
|                 | H  | Ala129 | 1.86 |       |        |      |
|                 | H  | Hie45  | 3.05 |       |        |      |
|                 | H  | Gly51  | 1.90 |       |        |      |
|                 | O  | Gly46  | 2.71 |       |        |      |
|                 | O  | Gly47  | 2.56 |       |        |      |
|                 | O  | Lys102 | 2.82 |       |        |      |
|                 | O  | Pro136 | 2.79 |       |        |      |
| Nsp7            | H  | Ala129 | 2.63 |       |        |      |
|                 | H  | Gly46  | 2.49 |       |        |      |
|                 | H  | Gly46  | 2.60 |       |        |      |
|                 | O  | Gln31  | 1.79 | -     | -      | -    |
|                 | O  | Ser57  | 2.15 |       |        |      |
|                 | H  | Glu50  | 2.97 |       |        |      |
|                 | H  | Ser54  | 2.38 |       |        |      |
|                 | H  | Gln31  | 2.01 |       |        |      |

|       |    |         |      |              |         |      |
|-------|----|---------|------|--------------|---------|------|
| Nsp8  | H  | Val53   | 2.11 |              |         |      |
|       | H  | Glu50   | 1.74 |              |         |      |
|       | H  | Gln31   | 1.80 |              |         |      |
|       | O  | Lys51   | 2.55 |              |         |      |
|       | O  | Lys51   | 2.87 |              |         |      |
|       | H  | Ser54   | 3.00 |              |         |      |
|       | H  | Glu50   | 2.87 |              |         |      |
|       | H  | Ser54   | 3.07 |              |         |      |
|       | HO | Met94   | 2.08 | Alkyl        | Pro121  | 3.99 |
|       | H  | Met129  | 1.62 | Alkyl        | Leu117  | 4.31 |
|       | H  | Met129  | 2.92 | Alkyl        | Pro121  | 4.12 |
|       | H  | Thr124  | 1.96 | Alkyl        | Val131  | 5.02 |
|       | O  | Met90   | 2.64 | Alkyl        | Pro121  | 4.73 |
|       | O  | Lys97   | 2.57 |              |         |      |
|       | H  | Ser164  | 2.75 |              |         |      |
|       | H  | Met129  | 2.47 |              |         |      |
| Nsp9  | O  | Leu9    | 2.98 | Alkyl        | Val110  | 4.88 |
|       | O  | Ser13   | 1.96 |              |         |      |
|       | O  | Arg39   | 1.92 |              |         |      |
|       | HO | Thr109  | 2.75 |              |         |      |
|       | H  | Leu9    | 1.72 |              |         |      |
|       | H  | Asp78   | 1.84 |              |         |      |
|       | H  | Ser105  | 1.81 |              |         |      |
|       | O  | Met12   | 2.77 |              |         |      |
|       | O  | Asn27   | 2.74 |              |         |      |
|       | H  | Leu9    | 2.90 |              |         |      |
|       | O  | Lys4348 | 2.83 | Alkyl        | Val4369 | 4.61 |
|       | O  | Lys4348 | 2.80 | Alkyl        | Val4369 | 4.75 |
|       | H  | Asn4338 | 2.00 | $\pi$ -Alkyl | Phe4342 | 5.46 |
|       | H  | Pro4337 | 1.70 |              |         |      |
|       | H  | Ile4308 | 1.95 |              |         |      |
| Nsp10 | O  | Pro4339 | 2.39 |              |         |      |
|       | O  | Pro4339 | 2.57 |              |         |      |
|       | O  | Lys4348 | 2.57 |              |         |      |
|       | H  | Pro4337 | 2.87 |              |         |      |
|       | H  | Asn4338 | 2.59 |              |         |      |
|       | H  | Pro4339 | 2.57 |              |         |      |
|       | H  | Cyt4370 | 2.58 |              |         |      |
|       | H  | Phe4342 | 3.02 |              |         |      |
|       | O  | Hie439  | 1.96 | Alkyl        | Ala688  | 4.05 |
|       | O  | Ala550  | 1.85 | Alkyl        | Cys813  | 5.42 |
|       | O  | Lys551  | 2.29 | Alkyl        | Leu758  | 4.88 |
|       | O  | Arg555  | 2.68 | Alkyl        | Cys813  | 3.93 |
|       | O  | Lys593  | 2.86 |              |         |      |
| Nsp12 | O  | Lys621  | 2.14 |              |         |      |
|       | O  | Asp623  | 3.00 |              |         |      |
|       | O  | Ala688  | 2.37 |              |         |      |
|       | O  | Asn691  | 2.43 |              |         |      |
|       | O  | Gln815  | 2.52 |              |         |      |
|       | HO | Asp684  | 2.33 |              |         |      |
|       | H  | Asp865  | 2.14 |              |         |      |

|                           |    |        |      |       |        |      |
|---------------------------|----|--------|------|-------|--------|------|
| Nsp13 (helicase ADP site) | H  | Ser814 | 1.95 |       |        |      |
|                           | H  | Asp760 | 1.92 |       |        |      |
|                           | O  | Ser549 | 2.72 |       |        |      |
|                           | O  | Lys551 | 2.79 |       |        |      |
|                           | H  | Asp623 | 2.53 |       |        |      |
|                           | H  | Tyr619 | 3.09 |       |        |      |
|                           | H  | Tyr619 | 2.40 |       |        |      |
|                           | H  | Cys813 | 2.71 |       |        |      |
|                           | H  | Ser814 | 2.61 |       |        |      |
|                           | H  | Asp760 | 2.54 |       |        |      |
|                           | H  | Ser549 | 2.69 |       |        |      |
|                           | O  | Ser289 | 2.79 | Alkyl | Ala312 | 3.46 |
|                           | O  | Lys320 | 2.41 | Alkyl | Ala316 | 3.60 |
|                           | O  | Lys320 | 2.80 |       |        |      |
|                           | O  | Lys323 | 2.18 |       |        |      |
|                           | O  | Arg442 | 1.96 |       |        |      |
|                           | H  | Ser539 | 1.67 |       |        |      |
|                           | H  | Ala316 | 1.82 |       |        |      |
|                           | H  | Tyr324 | 1.89 |       |        |      |
|                           | H  | Arg442 | 2.16 |       |        |      |
|                           | H  | Glu319 | 2.29 |       |        |      |
|                           | O  | Ser289 | 2.47 |       |        |      |
|                           | H  | Arg442 | 2.91 |       |        |      |
|                           | H  | Ser289 | 3.02 |       |        |      |
|                           | H  | His290 | 2.93 |       |        |      |
|                           | O  | Arg178 | 1.95 | Alkyl | Ala312 | 4.47 |
|                           | O  | Gln531 | 3.04 | Alkyl | Val340 | 4.04 |
|                           | H  | Asp534 | 2.53 |       |        |      |
| Nsp13 (helicase NCB site) | HO | Glu201 | 1.97 |       |        |      |
|                           | H  | Asp534 | 1.95 |       |        |      |
|                           | H  | Thr530 | 1.79 |       |        |      |
|                           | H  | Gln537 | 2.51 |       |        |      |
|                           | H  | Ser539 | 3.08 |       |        |      |
|                           | H  | Glu375 | 2.89 |       |        |      |
|                           | O  | Pro529 | 2.74 |       |        |      |
|                           | O  | Ser535 | 2.53 |       |        |      |
|                           | O  | Ser535 | 2.25 |       |        |      |
|                           | O  | Gly538 | 2.51 |       |        |      |
|                           | H  | Asp534 | 2.38 |       |        |      |
|                           | H  | Glu201 | 2.45 |       |        |      |
|                           | H  | Gln537 | 2.43 |       |        |      |
|                           | H  | Thr530 | 2.46 |       |        |      |
|                           | H  | Gln537 | 2.95 |       |        |      |
|                           | O  | Lys9   | 2.19 | Alkyl | Ala187 | 4.09 |
|                           | O  | Ser56  | 2.15 | Alkyl | Ala187 | 5.03 |
|                           | O  | Gly59  | 2.64 |       |        |      |
| Nsp14 (ExoN)              | O  | Phe60  | 2.84 |       |        |      |
|                           | O  | Lys61  | 2.51 |       |        |      |
|                           | O  | Leu253 | 2.79 |       |        |      |
|                           | H  | Gly6   | 1.88 |       |        |      |
|                           | H  | Gln245 | 2.44 |       |        |      |
|                           | H  | Thr250 | 3.07 |       |        |      |

|                         |    |         |      |              |         |      |
|-------------------------|----|---------|------|--------------|---------|------|
| Nsp14 (N7mtase)         | H  | Gly251  | 1.90 |              |         |      |
|                         | O  | Gly59   | 2.61 |              |         |      |
|                         | O  | Gly59   | 2.69 |              |         |      |
|                         | O  | Gly59   | 3.03 |              |         |      |
|                         | O  | Gly102  | 2.85 |              |         |      |
|                         | O  | Gly102  | 2.98 |              |         |      |
|                         | O  | Asn252  | 2.36 |              |         |      |
|                         | H  | Gly102  | 2.29 |              |         |      |
|                         | H  | Gly251  | 2.82 |              |         |      |
|                         | H  | Gln245  | 2.76 |              |         |      |
|                         | O  | Arg310  | 2.15 | -            | -       | -    |
|                         | O  | Gln354  | 2.44 |              |         |      |
|                         | O  | Ser357  | 2.04 |              |         |      |
|                         | HO | Arg289  | 1.84 |              |         |      |
|                         | H  | Asp291  | 2.75 |              |         |      |
|                         | H  | Pro355  | 2.99 |              |         |      |
|                         | H  | Hie424  | 2.35 |              |         |      |
|                         | O  | Lys336  | 2.47 |              |         |      |
|                         | O  | Hie235  | 2.24 | Alkyl        | Cys291  | 3.97 |
|                         | O  | Hie235  | 2.67 | $\pi$ -Alkyl | Trp333  | 5.20 |
|                         | O  | His243  | 1.99 | $\pi$ -Alkyl | Trp333  | 4.83 |
|                         | O  | Ser244  | 1.95 | $\pi$ -Alkyl | Trp333  | 4.19 |
|                         | O  | Gln245  | 2.55 | $\pi$ -Alkyl | Trp333  | 4.61 |
|                         | O  | Cys291  | 2.19 | $\pi$ -Alkyl | Tyr343  | 3.81 |
| Nsp15 (Exoribonuclease) | H  | Gln245  | 1.78 |              |         |      |
|                         | H  | His243  | 1.95 |              |         |      |
|                         | H  | Ser244  | 1.74 |              |         |      |
|                         | H  | Glu340  | 2.35 |              |         |      |
|                         | H  | Tyr343  | 1.79 |              |         |      |
|                         | O  | Hie235  | 2.98 |              |         |      |
|                         | O  | Ser244  | 3.07 |              |         |      |
|                         | O  | Gly247  | 2.96 |              |         |      |
|                         | H  | Gln245  | 2.28 |              |         |      |
|                         | H  | Glu340  | 2.48 |              |         |      |
|                         | O  | Lys6935 | 2.29 | Alkyl        | Lys6935 | 4.79 |
|                         | O  | Ser6999 | 2.03 | Alkyl        | Lys6935 | 4.95 |
|                         | H  | Asp6873 | 2.59 | $\pi$ -Alkyl | Tyr6930 | 5.39 |
|                         | H  | Tyr6930 | 1.77 |              |         |      |
|                         | H  | Asn6899 | 2.66 |              |         |      |
|                         | H  | Tyr6828 | 1.92 |              |         |      |
|                         | H  | Asp6830 | 2.04 |              |         |      |
| Nsp16 (GTA site)        | H  | Asp6928 | 1.90 |              |         |      |
|                         | O  | Ser6872 | 2.62 |              |         |      |
|                         | O  | Met6929 | 2.85 |              |         |      |
|                         | O  | Lys6935 | 2.61 |              |         |      |
|                         | H  | Asn6996 | 2.68 |              |         |      |
|                         | H  | Gly6869 | 2.90 |              |         |      |
|                         | H  | Asp6928 | 2.62 |              |         |      |
|                         | H  | Asn6996 | 2.55 |              |         |      |
| Nsp16 (MGP site)        | O  | Ala6808 | 2.77 | $\pi$ -Alkyl | Trp6987 | 4.56 |
|                         | H  | Ser6800 | 1.93 | $\pi$ -Alkyl | Trp6987 | 5.00 |

|                  |   |         |      |              |         |      |
|------------------|---|---------|------|--------------|---------|------|
| Nsp16 (SAM site) | H | Gln6804 | 1.70 | $\pi$ -Alkyl | Trp6987 | 4.67 |
|                  | H | Ser7074 | 2.29 | $\pi$ -Alkyl | Trp6987 | 4.20 |
|                  | H | Ala6808 | 1.77 |              |         |      |
|                  | H | Asn7008 | 2.83 |              |         |      |
|                  | H | Ser7074 | 2.87 |              |         |      |
|                  | O | Thr6854 | 2.78 |              |         |      |
|                  | O | Thr6854 | 2.74 |              |         |      |
|                  | H | Ala6808 | 2.74 |              |         |      |
|                  | H | Thr6856 | 2.82 |              |         |      |
|                  | H | Thr6856 | 3.00 |              |         |      |
|                  | O | Tyr6930 | 2.78 | -            | -       | -    |
|                  | O | Lys6935 | 2.32 |              |         |      |
|                  | O | Lys6935 | 2.97 |              |         |      |
|                  | O | Lys6935 | 2.63 |              |         |      |
|                  | O | Ser6999 | 2.40 |              |         |      |
|                  | H | Asp6928 | 1.82 |              |         |      |
|                  | H | Gly6871 | 1.98 |              |         |      |
|                  | H | Asp6897 | 2.58 |              |         |      |
|                  | H | Asp6928 | 1.92 |              |         |      |
|                  | H | Asn6996 | 1.84 |              |         |      |
|                  | O | Gly6829 | 2.86 |              |         |      |
|                  | O | Gly6829 | 2.50 |              |         |      |
|                  | H | Asp6897 | 2.86 |              |         |      |
|                  | H | Asn6996 | 2.50 |              |         |      |

**Table S2.** Computation of MM/GBSA energies of top ten docked poses of teicoplanin in complex with 25 potential COVID-19 targets.

| SN | Targets              | Docking Models | AutoDock                         | MM/GBSA                  |                          |                           |                          |        |                         |        |
|----|----------------------|----------------|----------------------------------|--------------------------|--------------------------|---------------------------|--------------------------|--------|-------------------------|--------|
|    |                      |                | Vina<br>$\Delta G_{\text{Bind}}$ | $\Delta G_{\text{Bind}}$ | $\Delta G_{\text{Coul}}$ | $\Delta G_{\text{HBond}}$ | $\Delta G_{\text{Lipo}}$ | SolvGB | $\Delta G_{\text{vdw}}$ | Lig SE |
| 1  | Main protease        | 1M1            | -5.7                             | -64.91                   | -25.07                   | -2.64                     | -49.96                   | 41.57  | -53.29                  | 40.50  |
|    |                      | 1M2            | -5.7                             | -46.33                   | -27.67                   | -0.73                     | -45.85                   | 49.04  | -51.94                  | 44.16  |
|    |                      | 1M3            | -5.4                             | -61.45                   | -10.99                   | -1.09                     | -48.02                   | 44.53  | -66.48                  | 42.41  |
|    |                      | 1M4            | -5.4                             | -97.55                   | -19.11                   | -0.68                     | -59.81                   | 44.25  | -68.46                  | 3.87   |
|    |                      | 1M5            | -5.3                             | -42.53                   | -5.12                    | -1.62                     | -29.12                   | 34.28  | -50.01                  | 54.54  |
|    |                      | 1M6            | -5.2                             | -32.51                   | -7.36                    | -3.87                     | -47.17                   | 46.82  | -52.82                  | 71.58  |
|    |                      | 1M7            | -5.2                             | -58.97                   | 14.97                    | -1.49                     | -49.93                   | 38.00  | -65.00                  | 36.50  |
|    |                      | 1M8            | -5.2                             | -67.90                   | -18.75                   | -0.65                     | -53.78                   | 47.89  | -58.45                  | 19.15  |
|    |                      | 1M9            | -5.1                             | -46.37                   | -14.41                   | -3.08                     | -36.69                   | 41.28  | -48.26                  | 53.40  |
|    |                      | 1M10           | -5.1                             | -56.25                   | -30.91                   | -1.93                     | -59.75                   | 54.17  | -46.81                  | 42.45  |
| 2  | Papain-like protease | 2M1            | -5.4                             | -78.75                   | -39.06                   | -3.33                     | -58.73                   | 54.34  | -42.74                  | 39.85  |
|    |                      | 2M2            | -5.2                             | -74.17                   | -25.87                   | -2.61                     | -53.59                   | 58.52  | -52.61                  | 18.25  |
|    |                      | 2M3            | -5.1                             | -70.66                   | -53.54                   | -4.33                     | -43.54                   | 56.28  | -34.50                  | 38.76  |
|    |                      | 2M4            | -5.1                             | -47.95                   | -37.96                   | -1.05                     | -34.11                   | 46.03  | -41.05                  | 40.92  |
|    |                      | 2M5            | -5.1                             | -52.18                   | -10.37                   | -1.55                     | -47.00                   | 48.32  | -45.61                  | 16.46  |
|    |                      | 2M6            | -4.7                             | -46.55                   | -28.60                   | -0.87                     | -28.98                   | 37.45  | -41.19                  | 21.59  |
|    |                      | 2M7            | -4.7                             | -25.48                   | -16.71                   | -1.45                     | -35.50                   | 45.65  | -57.59                  | 58.92  |
|    |                      | 2M8            | -4.6                             | -59.04                   | -33.59                   | -1.33                     | -50.31                   | 43.26  | -59.09                  | 62.35  |
|    |                      | 2M9            | -4.6                             | -53.41                   | -31.57                   | -2.99                     | -22.03                   | 48.41  | -43.28                  | 9.55   |
|    |                      | 2M10           | -4.6                             | -51.19                   | -30.35                   | -2.22                     | -56.59                   | 50.69  | -43.79                  | 63.80  |
| 3  |                      | 3M1            | -9.8                             | 75.76                    | -124.58                  | -4.94                     | -91.90                   | 209.45 | -17.65                  | 184.45 |



|      |                                |      |                 |        |         |        |        |        |         |        |
|------|--------------------------------|------|-----------------|--------|---------|--------|--------|--------|---------|--------|
|      | RdRp (RTP site)                | 3M2  | -9.5            | 213.43 | -48.00  | -6.35  | -39.95 | 223.55 | -29.34  | 184.68 |
|      |                                | 3M3  | -9.5            | 253.29 | -114.47 | -7.47  | -35.74 | 239.96 | -15.42  | 272.34 |
|      |                                | 3M4  | -9.4            | 117.68 | -117.20 | -6.77  | -37.75 | 250.73 | -64.96  | 133.94 |
|      |                                | 3M5  | -9.3            | 203.79 | -41.73  | -7.24  | -24.03 | 243.74 | -62.70  | 164.86 |
|      |                                | 3M6  | -9.2            | 237.92 | -60.39  | -6.64  | -43.14 | 205.47 | 20.84   | 201.55 |
|      |                                | 3M7  | -9.1            | 217.46 | -63.92  | -7.47  | -37.20 | 198.79 | -1.13   | 192.32 |
|      |                                | 3M8  | -9.1            | 223.38 | -92.89  | -6.56  | -39.18 | 208.35 | -0.71   | 221.88 |
|      |                                | 3M9  | -9              | 122.55 | -133.38 | -8.90  | -42.75 | 293.51 | -46.87  | 111.36 |
|      |                                | 3M10 | -8.9            | 139.53 | -135.56 | -6.38  | -40.16 | 262.03 | -33.97  | 154.17 |
|      |                                | 4    | RdRp (RNA site) | 4M1    | -8      | -80.86 | -31.92 | -3.56  | -49.26  | 76.38  |
| 4M2  | -7.9                           |      |                 | -67.31 | -64.86  | -7.71  | -11.69 | 81.61  | -70.62  | 48.70  |
| 4M3  | -7.8                           |      |                 | -54.12 | -40.83  | -4.58  | -17.85 | 71.17  | -76.88  | 28.45  |
| 4M4  | -7.7                           |      |                 | -31.16 | -27.12  | -6.97  | -18.03 | 68.16  | -84.02  | 44.52  |
| 4M5  | -7.7                           |      |                 | -65.71 | -42.03  | -3.42  | -21.59 | 90.58  | -103.70 | 16.33  |
| 4M6  | -7.7                           |      |                 | -38.91 | -32.71  | -5.02  | -21.65 | 71.14  | -78.36  | 40.00  |
| 4M7  | -7.7                           |      |                 | -86.33 | -68.97  | -6.24  | -13.97 | 78.93  | -83.45  | 10.54  |
| 4M8  | -7.6                           |      |                 | -71.88 | -35.76  | -4.90  | -25.19 | 57.49  | -74.53  | 30.50  |
| 4M9  | -7.6                           |      |                 | -63.35 | -3.24   | -4.95  | -22.01 | 53.50  | -88.85  | 7.60   |
| 4M10 | -7.5                           |      |                 | -46.32 | -29.49  | -5.00  | -15.19 | 75.62  | -86.77  | 17.43  |
| 5    | Spike protein (RBD)            | 5M1  | -6.5            | -74.61 | -31.09  | -4.78  | -46.45 | 32.98  | -53.94  | 30.35  |
|      |                                | 5M2  | -6.3            | -91.99 | -40.79  | -1.98  | -46.65 | 45.40  | -51.99  | 21.37  |
|      |                                | 5M3  | -6.3            | -42.47 | -32.73  | -1.28  | -26.75 | 43.82  | -56.38  | 47.64  |
|      |                                | 5M4  | -6.3            | -59.41 | -35.06  | -2.61  | -26.04 | 50.50  | -54.06  | 31.24  |
|      |                                | 5M5  | -6.2            | -61.83 | -31.56  | -2.27  | -44.14 | 49.98  | -54.09  | 58.67  |
|      |                                | 5M6  | -6.2            | -82.43 | -40.93  | -2.43  | -46.19 | 48.65  | -52.83  | 33.67  |
|      |                                | 5M7  | -6.2            | -73.19 | -62.56  | -4.00  | -38.54 | 52.55  | -45.98  | 21.05  |
|      |                                | 5M8  | -6.1            | -95.76 | -32.67  | -2.13  | -54.25 | 48.60  | -66.71  | 18.19  |
|      |                                | 5M9  | -6              | -48.85 | -28.39  | -1.24  | -17.57 | 43.40  | -58.68  | 38.99  |
|      |                                | 5M10 | -5.9            | -37.69 | -21.65  | -4.11  | -29.59 | 36.16  | -51.90  | 68.18  |
| 6    | Spike monomer                  | 6M1  | -5.9            | -66.37 | -28.83  | -2.87  | -33.02 | 41.91  | -53.45  | 23.41  |
|      |                                | 6M2  | -5.7            | -60.41 | -20.71  | -3.46  | -21.67 | 49.85  | -72.35  | 10.47  |
|      |                                | 6M3  | -5.5            | -42.80 | -28.25  | -4.88  | -15.01 | 46.75  | -53.37  | 29.61  |
|      |                                | 6M4  | -5.4            | -68.38 | -61.51  | -4.39  | -13.35 | 55.98  | -50.51  | 12.74  |
|      |                                | 6M5  | -5.3            | -60.45 | -35.63  | -4.99  | -16.62 | 52.30  | -61.41  | 32.42  |
|      |                                | 6M6  | -5.1            | -39.04 | -37.69  | -5.51  | -14.41 | 43.93  | -41.89  | 40.92  |
|      |                                | 6M7  | -5.1            | -32.77 | -6.19   | -5.53  | -15.28 | 40.33  | -61.59  | 37.39  |
|      |                                | 6M8  | -4.9            | -33.54 | -33.91  | -4.65  | -14.65 | 49.13  | -57.05  | 35.52  |
|      |                                | 6M9  | -4.9            | -52.97 | -39.13  | -5.16  | -14.41 | 30.19  | -35.12  | 18.00  |
|      |                                | 6M10 | -4.9            | -21.68 | -26.69  | -2.91  | -12.79 | 44.51  | -39.90  | 19.71  |
| 7    | Spike trimer                   | 7M1  | -7              | -45.17 | -31.10  | -3.69  | -26.16 | 52.35  | -51.26  | 50.09  |
|      |                                | 7M2  | -7              | -40.62 | -24.38  | -2.45  | -27.74 | 52.50  | -64.60  | 30.83  |
|      |                                | 7M3  | -6.9            | -66.87 | -27.37  | -4.11  | -21.53 | 53.95  | -65.20  | 11.90  |
|      |                                | 7M4  | -6.8            | -58.88 | -25.84  | -4.74  | -23.74 | 43.18  | -60.36  | 36.34  |
|      |                                | 7M5  | -6.8            | -30.88 | -7.72   | -3.99  | -22.06 | 45.59  | -65.77  | 51.27  |
|      |                                | 7M6  | -6.7            | -36.28 | -20.40  | -3.06  | -19.38 | 44.04  | -70.13  | 38.92  |
|      |                                | 7M7  | -6.7            | -39.74 | -30.06  | -2.55  | -15.91 | 55.91  | -58.96  | 19.47  |
|      |                                | 7M8  | -6.7            | -14.41 | -16.83  | -4.29  | -23.21 | 64.93  | -70.51  | 61.70  |
|      |                                | 7M9  | -6.6            | -46.41 | -1.90   | -2.85  | -27.63 | 57.14  | -81.01  | 23.31  |
|      |                                | 7M10 | -6.6            | -43.74 | -28.36  | -2.84  | -17.77 | 48.76  | -58.50  | 20.65  |
| 8    | S2 protein (post fusion state) | 8M1  | -5.7            | -25.01 | -22.12  | -3.50  | -11.40 | 61.44  | -70.72  | 30.74  |
|      |                                | 8M2  | -5.6            | -16.94 | -19.57  | -3.37  | -10.79 | 49.75  | -59.71  | 29.01  |
|      |                                | 8M3  | -5.5            | -34.28 | -20.12  | -3.33  | -14.41 | 56.83  | -63.82  | 16.74  |

|    |                      |       |      |         |        |       |        |       |        |       |
|----|----------------------|-------|------|---------|--------|-------|--------|-------|--------|-------|
| 9  | N-protein (C domain) | 8M4   | -5.3 | -36.93  | -23.22 | -2.74 | -14.11 | 55.19 | -61.27 | 24.45 |
|    |                      | 8M5   | -5.2 | -13.34  | -2.29  | -0.45 | -12.66 | 44.62 | -57.77 | 31.85 |
|    |                      | 8M6   | -5.2 | -8.02   | -45.43 | -2.78 | -13.00 | 96.04 | -60.31 | 27.81 |
|    |                      | 8M7   | -5.1 | -21.95  | -21.01 | -2.64 | -14.25 | 57.36 | -66.30 | 41.41 |
|    |                      | 8M8   | -5   | -8.93   | -43.83 | -3.07 | -12.01 | 99.61 | -56.45 | 27.36 |
|    |                      | 8M9   | -4.9 | -29.72  | -45.05 | -3.26 | -14.98 | 83.85 | -61.54 | 12.77 |
|    |                      | 8M10  | -4.9 | -14.18  | -20.44 | -2.53 | -15.49 | 79.39 | -70.49 | 29.54 |
|    |                      | 9M1   | -6.1 | -34.14  | -17.41 | -3.14 | -18.18 | 62.01 | -63.42 | 17.77 |
|    |                      | 9M2   | -6.1 | -22.10  | -38.33 | -3.49 | -9.96  | 64.64 | -50.20 | 36.01 |
|    |                      | 9M3   | -5.7 | -35.76  | -33.37 | -4.27 | -18.96 | 69.74 | -68.03 | 29.21 |
| 10 | N-protein (N domain) | 9M4   | -5.7 | -30.45  | -9.78  | -4.67 | -19.99 | 48.32 | -67.16 | 38.30 |
|    |                      | 9M5   | -5.6 | -42.31  | -30.82 | -5.06 | -16.05 | 64.88 | -62.43 | 26.93 |
|    |                      | 9M6   | -5.6 | -28.79  | 1.21   | -2.26 | -18.55 | 38.59 | -55.07 | 19.45 |
|    |                      | 9M7   | -5.5 | -13.17  | -4.55  | -2.66 | -25.30 | 66.29 | -69.88 | 37.08 |
|    |                      | 9M8   | -5.5 | -20.37  | -9.70  | -1.67 | -21.23 | 41.66 | -51.36 | 34.39 |
|    |                      | 9M9   | -5.4 | -40.57  | -33.98 | -3.22 | -17.73 | 62.10 | -58.74 | 26.57 |
|    |                      | 9M10  | -5.3 | -20.59  | -13.97 | -2.84 | -16.50 | 37.59 | -50.91 | 46.02 |
|    |                      | 10M1  | -8.8 | -88.69  | -38.01 | -5.70 | -19.15 | 47.39 | -74.01 | 14.84 |
|    |                      | 10M2  | -8.7 | -64.99  | -14.73 | -4.54 | -19.23 | 44.95 | -73.27 | 29.76 |
|    |                      | 10M3  | -8.5 | -51.02  | -20.97 | -4.87 | -24.51 | 48.77 | -73.49 | 50.30 |
| 11 | Nsp3 (AMP site)      | 10M4  | -8.4 | -43.37  | -31.79 | -4.45 | -23.05 | 53.94 | -67.14 | 39.75 |
|    |                      | 10M5  | -8.2 | -39.70  | -25.53 | -4.80 | -30.34 | 58.62 | -78.82 | 59.51 |
|    |                      | 10M6  | -7.9 | -45.23  | -26.57 | -5.48 | -25.33 | 52.24 | -66.46 | 43.61 |
|    |                      | 10M7  | -7.9 | -43.37  | -39.45 | -5.68 | -9.95  | 61.56 | -61.00 | 52.34 |
|    |                      | 10M8  | -7.8 | -53.25  | -23.28 | -4.22 | -16.99 | 44.70 | -70.46 | 47.13 |
|    |                      | 10M9  | -7.7 | -13.19  | -20.61 | -5.13 | -10.61 | 61.16 | -68.57 | 80.32 |
|    |                      | 10M10 | -7.4 | -102.13 | -40.95 | -6.98 | -24.95 | 61.07 | -78.69 | -0.90 |
|    |                      | 11M1  | -7.3 | -37.74  | 1.62   | -2.22 | -28.83 | 39.04 | -67.60 | 36.07 |
|    |                      | 11M2  | -7.3 | -58.33  | -42.82 | -4.38 | -25.86 | 64.42 | -71.09 | 32.93 |
|    |                      | 11M3  | -7.3 | -34.25  | -2.31  | -2.27 | -25.57 | 31.96 | -65.18 | 30.90 |
| 12 | Nsp3 (MES site)      | 11M4  | -7.1 | -44.98  | -17.89 | -2.56 | -25.49 | 52.30 | -70.59 | 35.64 |
|    |                      | 11M5  | -6.6 | -26.80  | 9.51   | -0.47 | -21.45 | 25.16 | -60.25 | 28.75 |
|    |                      | 11M6  | -6.6 | -27.10  | -2.74  | -1.44 | -17.34 | 45.46 | -67.53 | 44.71 |
|    |                      | 11M7  | -6.6 | -49.22  | -31.83 | -3.35 | -16.14 | 51.02 | -70.27 | 25.62 |
|    |                      | 11M8  | -6.4 | -23.60  | -18.81 | -2.37 | -15.06 | 47.09 | -53.49 | 43.34 |
|    |                      | 11M9  | -6.4 | -54.41  | -11.12 | -2.79 | -17.08 | 33.56 | -65.77 | 32.16 |
|    |                      | 11M10 | -6.3 | -54.16  | -17.77 | -2.30 | -12.49 | 39.34 | -65.03 | 3.82  |
|    |                      | 12M1  | -6.1 | -43.26  | -10.27 | -3.06 | -24.41 | 49.16 | -67.74 | 36.28 |
|    |                      | 12M2  | -6.1 | -33.82  | -14.29 | -4.56 | -28.21 | 46.29 | -56.82 | 61.07 |
|    |                      | 12M3  | -5.9 | -57.60  | -12.61 | -2.42 | -30.13 | 34.62 | -75.40 | 37.34 |
| 13 | Nsp7                 | 12M4  | -5.6 | -47.68  | -32.35 | -3.44 | -18.10 | 49.46 | -61.22 | 33.35 |
|    |                      | 12M5  | -5.5 | -51.61  | -17.26 | -3.03 | -21.12 | 43.16 | -61.40 | 26.87 |
|    |                      | 12M6  | -5.4 | -42.97  | -11.89 | -1.94 | -26.85 | 34.94 | -62.88 | 38.08 |
|    |                      | 12M7  | -5.3 | -43.63  | -27.19 | -2.99 | -22.22 | 40.83 | -50.56 | 28.24 |
|    |                      | 12M8  | -5.2 | -48.37  | -29.98 | -4.36 | -25.62 | 42.04 | -52.37 | 39.95 |
|    |                      | 12M9  | -5.2 | -36.15  | -25.57 | -4.74 | -15.39 | 35.39 | -47.63 | 38.73 |
|    |                      | 12M10 | -5.1 | -43.33  | -3.25  | -1.54 | -20.34 | 30.26 | -65.38 | 25.17 |
|    |                      | 13M1  | -5.2 | -26.63  | -25.65 | -1.50 | -13.13 | 50.89 | -50.83 | 18.66 |
|    |                      | 13M2  | -4.9 | -42.29  | -34.84 | -2.81 | -19.73 | 56.40 | -58.37 | 18.41 |
|    |                      | 13M3  | -4.7 | -7.18   | -5.28  | -3.28 | -13.07 | 46.38 | -51.46 | 52.87 |
|    |                      | 13M4  | -4.4 | -66.61  | -54.39 | -4.15 | -19.17 | 55.49 | -60.78 | 8.43  |
|    |                      | 13M5  | -4.1 | -19.64  | -29.42 | -3.42 | -12.66 | 47.18 | -45.67 | 40.05 |

|    |                                   |       |      |        |        |       |        |        |         |       |
|----|-----------------------------------|-------|------|--------|--------|-------|--------|--------|---------|-------|
| 14 | Nsp8                              | 13M6  | -3.9 | -4.02  | 2.55   | -1.97 | -11.15 | 37.51  | -58.47  | 46.14 |
|    |                                   | 13M7  | -3.9 | -32.59 | -16.95 | -2.77 | -14.77 | 45.27  | -47.03  | 13.64 |
|    |                                   | 13M8  | -3.9 | -44.20 | -35.42 | -3.37 | -21.33 | 66.94  | -65.69  | 22.09 |
|    |                                   | 13M9  | -3.8 | -22.57 | -15.52 | -3.78 | -14.77 | 46.48  | -57.15  | 34.62 |
|    |                                   | 13M10 | -3.7 | -21.10 | -31.49 | -3.31 | -17.03 | 54.38  | -60.19  | 49.76 |
|    |                                   | 14M1  | -7   | -40.86 | 8.45   | -1.97 | -27.19 | 24.42  | -68.20  | 44.83 |
|    |                                   | 14M2  | -6.7 | -10.97 | 21.42  | -1.77 | -14.58 | 28.08  | -62.69  | 58.04 |
|    |                                   | 14M3  | -6.2 | -64.46 | -19.68 | -3.01 | -27.43 | 34.13  | -54.25  | 31.30 |
|    |                                   | 14M4  | -6.2 | -32.48 | 9.13   | -1.54 | -20.01 | 30.57  | -57.92  | 38.90 |
|    |                                   | 14M5  | -6.1 | -43.84 | 3.97   | -0.85 | -21.39 | 31.97  | -63.54  | 29.91 |
| 15 | Nsp9                              | 14M6  | -6.1 | -58.54 | -1.60  | -3.21 | -23.07 | 23.68  | -68.72  | 35.54 |
|    |                                   | 14M7  | -6   | -56.07 | -3.84  | -1.92 | -30.28 | 21.53  | -59.84  | 29.46 |
|    |                                   | 14M8  | -5.9 | -67.93 | -10.55 | -2.28 | -25.51 | 28.75  | -68.85  | 16.42 |
|    |                                   | 14M9  | -5.9 | -9.80  | -0.87  | -1.50 | -21.33 | 34.71  | -46.76  | 48.31 |
|    |                                   | 14M10 | -5.9 | -57.18 | -23.05 | -2.39 | -22.58 | 42.24  | -67.22  | 29.99 |
|    |                                   | 15M1  | -5   | -65.41 | -44.21 | -5.05 | -20.94 | 61.63  | -68.43  | 26.18 |
|    |                                   | 15M2  | -4.6 | -29.70 | -12.43 | -3.27 | -15.18 | 52.94  | -66.93  | 26.23 |
|    |                                   | 15M3  | -4.5 | -66.83 | -43.87 | -3.59 | -19.55 | 46.75  | -57.02  | 10.15 |
|    |                                   | 15M4  | -4.3 | 0.66   | 5.02   | -1.54 | -7.59  | 29.09  | -46.72  | 41.15 |
|    |                                   | 15M5  | -4   | -58.92 | -33.40 | -3.73 | -17.80 | 55.27  | -67.12  | 10.53 |
| 16 | Nsp10                             | 15M6  | -3.8 | -22.74 | -31.88 | -2.38 | -12.94 | 54.98  | -45.30  | 29.37 |
|    |                                   | 15M7  | -3.4 | -32.33 | -34.35 | -3.32 | -13.73 | 46.62  | -48.05  | 40.14 |
|    |                                   | 15M8  | -3.4 | -24.26 | -19.53 | -2.80 | -11.71 | 49.97  | -59.36  | 39.80 |
|    |                                   | 15M9  | -3.3 | -35.83 | -8.80  | -2.65 | -17.22 | 49.54  | -63.28  | 25.47 |
|    |                                   | 15M10 | -3.1 | -25.58 | -13.79 | -3.74 | -9.18  | 42.58  | -51.15  | 32.35 |
|    |                                   | 16M1  | -4.4 | -11.29 | -5.33  | -4.47 | -16.23 | 61.45  | -60.16  | 56.98 |
|    |                                   | 16M2  | -2.8 | -16.01 | -15.59 | -3.35 | -9.32  | 54.52  | -52.29  | 13.19 |
|    |                                   | 16M3  | -2.6 | -25.83 | -30.15 | -4.77 | -11.85 | 54.10  | -53.85  | 40.00 |
|    |                                   | 16M4  | -2.3 | -35.50 | -21.16 | -3.83 | -11.13 | 44.07  | -52.46  | 18.57 |
|    |                                   | 16M5  | -2.2 | -47.56 | -29.62 | -2.47 | -23.97 | 57.87  | -62.53  | 40.47 |
| 17 | Nsp12                             | 16M6  | -1.7 | -34.50 | -42.90 | -2.76 | -12.47 | 54.17  | -43.17  | 9.41  |
|    |                                   | 16M7  | -1.6 | -22.69 | -19.80 | -3.29 | -20.89 | 56.23  | -53.17  | 40.06 |
|    |                                   | 16M8  | -1.6 | -31.33 | -7.44  | -0.60 | -13.64 | 35.27  | -54.00  | 0.49  |
|    |                                   | 16M9  | -1.4 | -13.16 | -24.80 | -4.55 | -0.46  | 56.80  | -39.61  | 32.66 |
|    |                                   | 16M10 | -1.1 | -44.10 | -27.82 | -2.80 | -11.34 | 45.56  | -52.31  | 9.99  |
|    |                                   | 17M1  | -8   | -69.05 | -39.13 | -6.34 | -18.19 | 79.99  | -102.58 | 36.33 |
|    |                                   | 17M2  | -8   | -68.41 | -46.76 | -5.99 | -23.37 | 89.68  | -106.35 | 35.49 |
|    |                                   | 17M3  | -7.8 | -87.84 | -96.33 | -8.48 | -19.26 | 135.75 | -108.20 | 8.52  |
|    |                                   | 17M4  | -7.4 | -11.32 | -40.30 | -4.84 | -19.48 | 109.74 | -94.39  | 50.76 |
|    |                                   | 17M5  | -7.2 | -24.57 | -49.55 | -7.52 | -23.55 | 126.72 | -90.20  | 52.20 |
| 18 | Nsp13 (hel-<br>icase ADP<br>site) | 17M6  | -7.1 | -8.66  | -45.04 | -6.20 | -22.82 | 96.19  | -69.71  | 49.76 |
|    |                                   | 17M7  | -7.1 | 23.00  | -15.87 | -5.08 | -9.41  | 74.06  | -52.53  | 62.29 |
|    |                                   | 17M8  | -7.1 | 8.76   | -25.15 | -6.14 | -19.96 | 91.35  | -63.61  | 54.27 |
|    |                                   | 17M9  | -7   | -34.11 | -29.02 | -8.72 | -12.57 | 67.09  | -76.06  | 47.50 |
|    |                                   | 17M10 | -7   | 67.78  | -21.66 | -5.26 | -17.41 | 102.26 | -45.75  | 83.32 |
|    |                                   | 18M1  | -6.6 | 10.59  | -48.06 | -6.21 | -14.26 | 89.32  | -41.34  | 54.40 |
|    |                                   | 18M2  | -6.6 | 2.60   | -30.10 | -5.03 | -14.48 | 68.84  | -51.54  | 42.07 |
|    |                                   | 18M3  | -6.5 | -41.57 | -63.94 | -7.00 | -19.36 | 88.70  | -53.79  | 16.23 |
|    |                                   | 18M4  | -6.4 | -0.80  | -10.63 | -3.93 | -12.45 | 54.81  | -46.29  | 41.87 |
|    |                                   | 18M5  | -6.2 | -29.82 | -2.92  | -3.60 | -8.18  | 44.81  | -62.99  | 13.90 |
|    |                                   | 18M6  | -6.2 | -20.65 | -38.92 | -4.12 | -12.96 | 69.06  | -58.74  | 26.05 |
|    |                                   | 18M7  | -6.2 | -22.47 | -54.76 | -6.55 | -5.06  | 78.91  | -43.44  | 39.00 |

|    |                                   |       |      |        |        |       |        |        |        |       |
|----|-----------------------------------|-------|------|--------|--------|-------|--------|--------|--------|-------|
| 19 | Nsp13 (hel-<br>icase NCB<br>site) | 18M8  | -6.1 | 1.47   | -15.95 | -6.03 | -13.33 | 69.21  | -51.47 | 27.64 |
|    |                                   | 18M9  | -6   | -35.99 | -36.54 | -2.79 | -12.01 | 65.42  | -57.06 | 12.82 |
|    |                                   | 18M10 | -5.9 | -16.45 | -15.80 | -1.71 | -8.68  | 54.10  | -48.38 | 15.65 |
|    |                                   | 19M1  | -6.4 | -20.11 | -50.92 | -4.46 | -23.73 | 92.54  | -62.00 | 40.26 |
|    |                                   | 19M2  | -6.4 | 0.74   | -37.44 | -4.95 | -26.35 | 95.39  | -75.95 | 67.99 |
|    |                                   | 19M3  | -6.4 | -13.41 | -45.41 | -6.32 | -20.53 | 75.40  | -46.06 | 52.14 |
|    |                                   | 19M4  | -6.2 | 68.15  | -46.42 | -5.18 | -28.20 | 109.29 | -39.46 | 96.50 |
|    |                                   | 19M5  | -6.2 | -47.55 | -66.12 | -6.54 | -23.12 | 118.38 | -88.16 | 39.58 |
|    |                                   | 19M6  | -6.2 | 5.63   | -53.23 | -5.76 | -29.98 | 108.00 | -58.60 | 60.71 |
|    |                                   | 19M7  | -5.8 | -7.70  | -34.37 | -5.17 | -31.20 | 97.76  | -80.37 | 59.34 |
| 20 | Nsp14<br>(ExoN)                   | 19M8  | -5.8 | 38.83  | -20.52 | -5.42 | -10.76 | 81.06  | -37.82 | 86.41 |
|    |                                   | 19M9  | -5.4 | 1.18   | -28.99 | -6.39 | -22.58 | 107.15 | -89.89 | 72.11 |
|    |                                   | 19M10 | -5.4 | -53.99 | -42.21 | -4.05 | -26.40 | 87.73  | -78.57 | 7.39  |
|    |                                   | 20M1  | -7.7 | -42.32 | -30.48 | -5.45 | -21.60 | 75.61  | -69.32 | 35.82 |
|    |                                   | 20M2  | -7.5 | -34.92 | -13.94 | -3.89 | -21.66 | 65.02  | -72.26 | 26.70 |
|    |                                   | 20M3  | -7.2 | -21.01 | -45.14 | -4.11 | -20.07 | 96.24  | -74.89 | 46.00 |
|    |                                   | 20M4  | -7.1 | -49.41 | -32.04 | -4.56 | -20.91 | 64.52  | -80.34 | 28.66 |
|    |                                   | 20M5  | -7.1 | -36.77 | -17.60 | -3.11 | -19.90 | 48.46  | -66.01 | 28.16 |
|    |                                   | 20M6  | -7.1 | -22.00 | -23.15 | -4.84 | -14.02 | 59.35  | -57.56 | 43.03 |
|    |                                   | 20M7  | -7   | -31.05 | -1.35  | -3.48 | -23.24 | 59.98  | -83.91 | 30.18 |
| 21 | Nsp14<br>(N7mtase)                | 20M8  | -7   | -20.73 | -29.69 | -5.58 | -12.41 | 72.45  | -70.50 | 49.47 |
|    |                                   | 20M9  | -7   | -32.55 | -29.75 | -3.85 | -15.35 | 61.67  | -57.88 | 25.24 |
|    |                                   | 20M10 | -6.8 | -46.01 | -45.55 | -5.37 | -16.52 | 85.23  | -74.48 | 25.38 |
|    |                                   | 21M1  | -3.5 | 5.75   | -30.70 | -5.41 | -9.54  | 69.16  | -43.23 | 58.57 |
|    |                                   | 21M2  | -3.1 | -38.04 | -33.66 | -5.47 | -18.33 | 58.77  | -48.87 | 11.98 |
|    |                                   | 21M3  | -3   | -38.83 | -21.49 | -4.69 | -15.49 | 47.57  | -44.45 | 1.51  |
|    |                                   | 21M4  | -3   | 47.17  | -4.40  | -3.33 | -31.26 | 83.37  | -33.08 | 65.62 |
|    |                                   | 21M5  | -2.9 | 5.80   | -25.73 | -4.61 | -15.36 | 84.18  | -61.67 | 51.06 |
|    |                                   | 21M6  | -2.8 | 41.53  | -27.06 | -3.52 | -31.61 | 82.10  | -32.35 | 74.56 |
|    |                                   | 21M7  | -2.7 | 50.56  | -19.24 | -4.96 | -10.93 | 55.34  | -11.77 | 84.78 |
| 22 | Nsp15 (Exori-<br>bonuclease)      | 21M8  | -2.7 | 35.99  | -9.50  | -3.58 | -14.53 | 66.28  | -56.46 | 94.42 |
|    |                                   | 21M9  | -2.5 | -29.13 | -40.06 | -3.58 | -19.41 | 64.24  | -46.76 | 27.06 |
|    |                                   | 21M10 | -2.3 | 37.93  | -29.19 | -3.74 | -30.66 | 86.65  | -30.51 | 70.73 |
|    |                                   | 22M1  | -6.9 | -1.36  | -20.15 | -3.34 | -24.02 | 55.24  | -56.15 | 68.84 |
|    |                                   | 22M2  | -6.5 | -64.40 | -48.67 | -6.39 | -23.20 | 47.29  | -55.77 | 43.43 |
|    |                                   | 22M3  | -6.5 | -30.47 | -27.83 | -4.04 | -16.11 | 53.97  | -63.06 | 55.29 |
|    |                                   | 22M4  | -6.2 | -50.93 | -31.21 | -4.28 | -24.49 | 53.94  | -61.55 | 34.98 |
|    |                                   | 22M5  | -6.2 | -36.69 | -17.40 | -2.31 | -20.42 | 47.15  | -57.56 | 15.21 |
|    |                                   | 22M6  | -6.2 | -51.59 | -17.90 | -4.66 | -16.32 | 38.59  | -51.78 | 33.42 |
|    |                                   | 22M7  | -6.2 | -24.27 | -9.37  | -3.55 | -16.98 | 41.12  | -49.74 | 36.83 |
| 23 | Nsp16 (GTA<br>site)               | 22M8  | -6.1 | -42.00 | -17.19 | -2.07 | -24.85 | 54.74  | -68.53 | 24.68 |
|    |                                   | 22M9  | -6.1 | -32.71 | -20.04 | -2.52 | -18.38 | 53.65  | -60.22 | 24.93 |
|    |                                   | 22M10 | -6.1 | -28.17 | -13.10 | -2.82 | -20.57 | 50.66  | -67.83 | 37.73 |
|    |                                   | 23M1  | -6.8 | -29.16 | -33.10 | -6.55 | -14.60 | 66.25  | -59.58 | 37.56 |
|    |                                   | 23M2  | -6.8 | -38.00 | -39.20 | -6.48 | -15.13 | 71.97  | -66.32 | 32.38 |
|    |                                   | 23M3  | -6.7 | -61.01 | -49.28 | -5.73 | -17.72 | 70.05  | -72.02 | 11.41 |
|    |                                   | 23M4  | -6.6 | -42.54 | -34.27 | -6.25 | -16.08 | 59.88  | -65.91 | 19.52 |
|    |                                   | 23M5  | -6.4 | -39.88 | -33.92 | -4.20 | -12.48 | 62.05  | -69.89 | 24.58 |
|    |                                   | 23M6  | -6.4 | -39.16 | -38.61 | -4.72 | -13.99 | 68.11  | -68.73 | 30.44 |
|    |                                   | 23M7  | -6.3 | -23.60 | -11.17 | -4.25 | -12.17 | 49.51  | -59.45 | 41.12 |
|    |                                   | 23M8  | -6.2 | -63.57 | -55.69 | -5.17 | -12.18 | 65.46  | -62.63 | 8.44  |
|    |                                   | 23M9  | -6.1 | 6.44   | -11.41 | -2.63 | -14.96 | 36.65  | -50.62 | 61.06 |

|    |                  |       |      |        |        |       |        |       |        |       |
|----|------------------|-------|------|--------|--------|-------|--------|-------|--------|-------|
| 24 | Nsp16 (MGP site) | 23M10 | -6.1 | -2.47  | -5.32  | -3.15 | -10.65 | 49.08 | -61.57 | 54.52 |
|    |                  | 24M1  | -7.8 | -29.24 | -23.42 | -3.94 | -29.01 | 76.00 | -72.54 | 39.15 |
|    |                  | 24M2  | -7.6 | -50.73 | -16.98 | -2.81 | -31.66 | 58.93 | -79.64 | 34.11 |
|    |                  | 24M3  | -7.6 | -33.03 | -19.24 | -1.91 | -23.32 | 64.57 | -74.99 | 27.54 |
|    |                  | 24M4  | -7.5 | -56.44 | -45.38 | -2.03 | -22.08 | 64.42 | -70.91 | 15.40 |
|    |                  | 24M5  | -7.4 | -51.13 | -41.60 | -1.88 | -23.11 | 70.23 | -65.10 | 17.51 |
|    |                  | 24M6  | -7.4 | -58.04 | -31.42 | -3.89 | -22.67 | 59.61 | -79.15 | 30.67 |
|    |                  | 24M7  | -7.4 | -49.36 | -35.59 | -3.11 | -17.92 | 59.18 | -63.75 | 22.72 |
|    |                  | 24M8  | -7.3 | -21.15 | -19.03 | -3.79 | -22.04 | 50.95 | -52.36 | 29.91 |
|    |                  | 24M9  | -7.3 | -50.94 | -31.21 | -1.90 | -24.62 | 72.08 | -77.65 | 14.32 |
| 25 | Nsp16 (SAM site) | 24M10 | -7.3 | -52.64 | -42.04 | -3.38 | -22.67 | 61.26 | -72.16 | 28.20 |
|    |                  | 25M1  | -6.5 | -54.88 | -34.65 | -4.69 | -21.69 | 74.67 | -74.43 | 15.52 |
|    |                  | 25M2  | -6.3 | -18.25 | -32.58 | -4.97 | -22.72 | 73.90 | -62.01 | 41.63 |
|    |                  | 25M3  | -6   | -38.31 | -39.18 | -5.27 | -21.22 | 84.23 | -72.94 | 36.95 |
|    |                  | 25M4  | -5.8 | -33.63 | -38.97 | -3.81 | -10.99 | 59.25 | -57.26 | 27.18 |
|    |                  | 25M5  | -5.7 | -41.14 | -54.00 | -4.02 | -12.58 | 71.47 | -57.64 | 21.71 |
|    |                  | 25M6  | -5.7 | -3.99  | 8.06   | -2.61 | -8.92  | 43.72 | -64.09 | 52.14 |
|    |                  | 25M7  | -5.7 | -36.30 | -20.54 | -3.35 | -13.22 | 46.06 | -59.81 | 16.72 |
|    |                  | 25M8  | -5.6 | -10.92 | -27.47 | -2.55 | -18.62 | 52.91 | -33.00 | 25.68 |
|    |                  | 25M9  | -5.6 | -10.55 | -21.28 | -3.22 | -20.16 | 56.94 | -43.15 | 27.36 |
|    |                  | 25M10 | -5.6 | 11.03  | -9.91  | -3.45 | -18.12 | 63.59 | -42.51 | 58.90 |

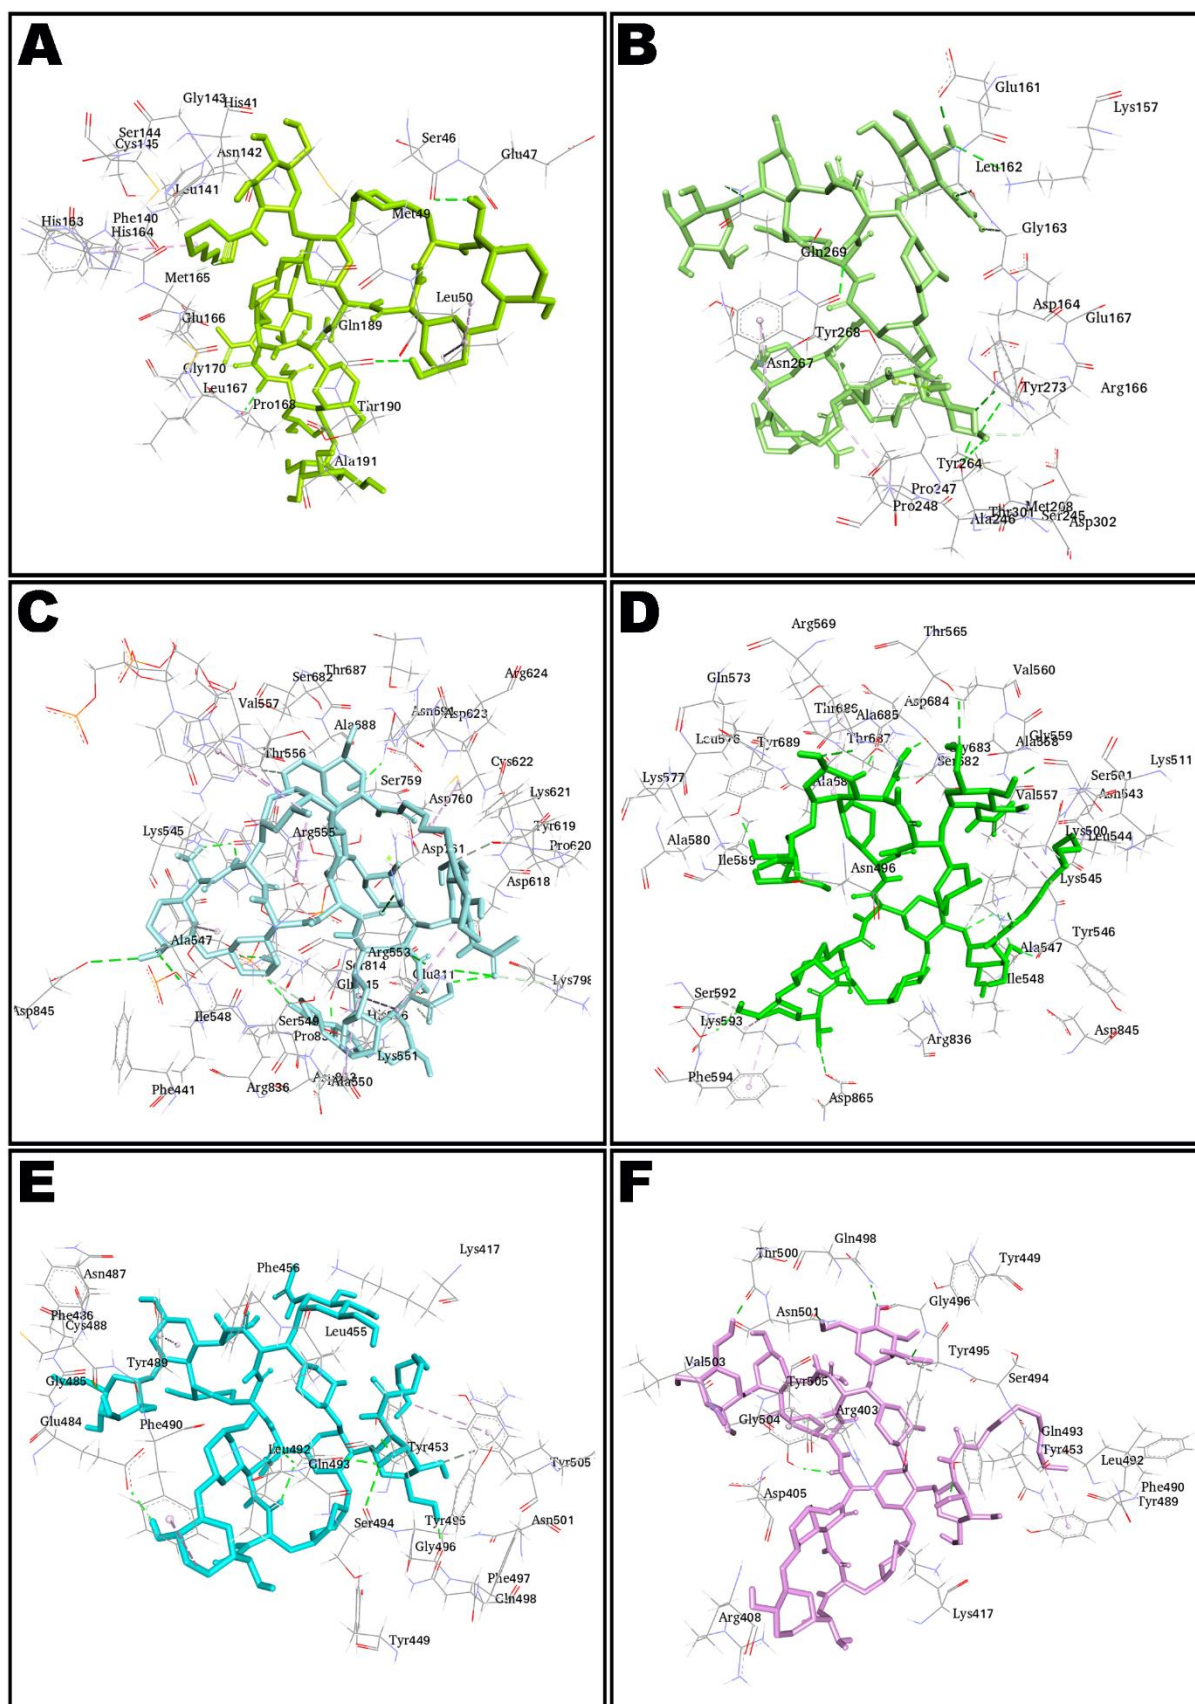

**Figure S1.** MM/GBSA optimized complexes of teicoplanin (displayed as stick) showing non-bond interactions with main protease (A), papain-like protease (B), RdRp-RTP site (C), RdRp-RNA site (D), spike protein-RBD (E), and spike monomer (F). Broken green lines enumerate hydrogen bonds whereas purple lines justify hydrophobic interactions.



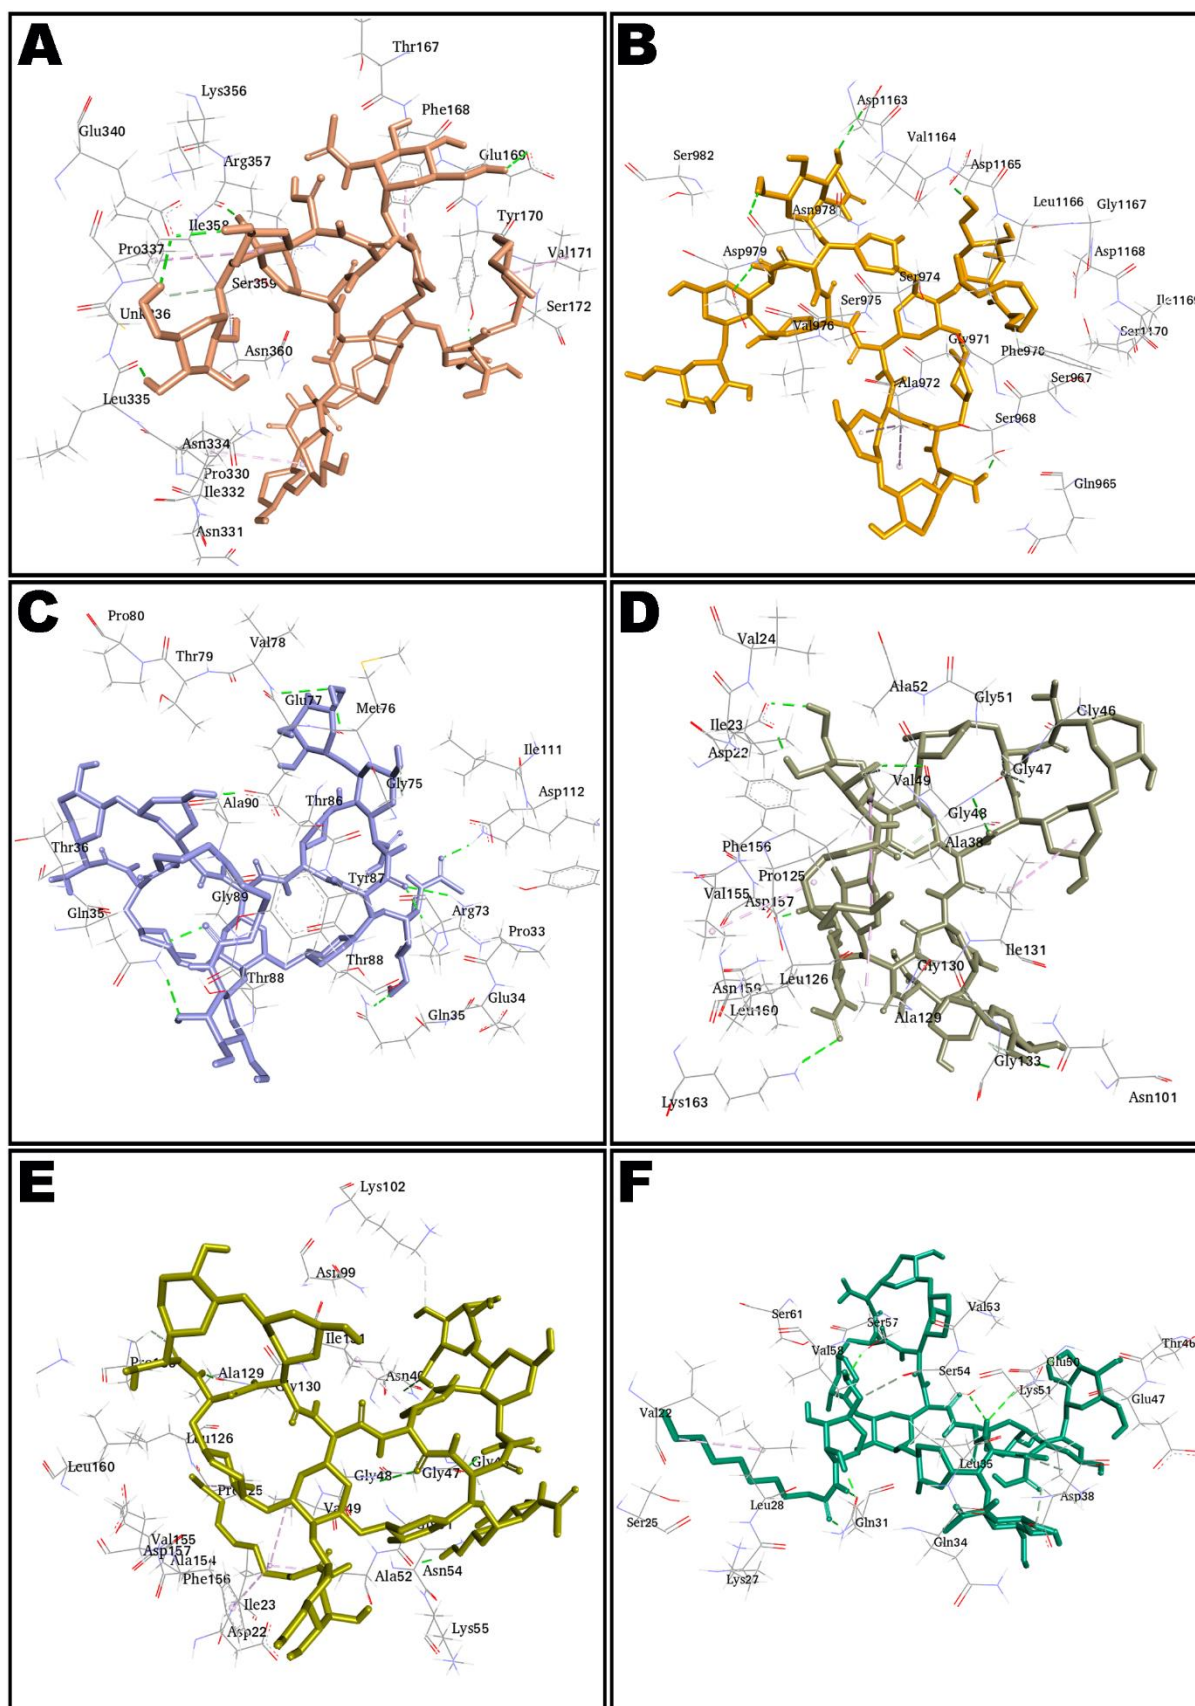

**Figure S2.** Non-bond interactions of teicoplanin (portrayed as stick style) with spike trimer (A), S2 protein-post fusion state (B), N-protein-C domain (C), Nsp3-AMP site (D), Nsp3-MES site (E), and Nsp7 (E) in MM/GBSA optimized complexes. Hydrogen bonds are shown by broken green lines and purple lines enumerate hydrophobic interactions.

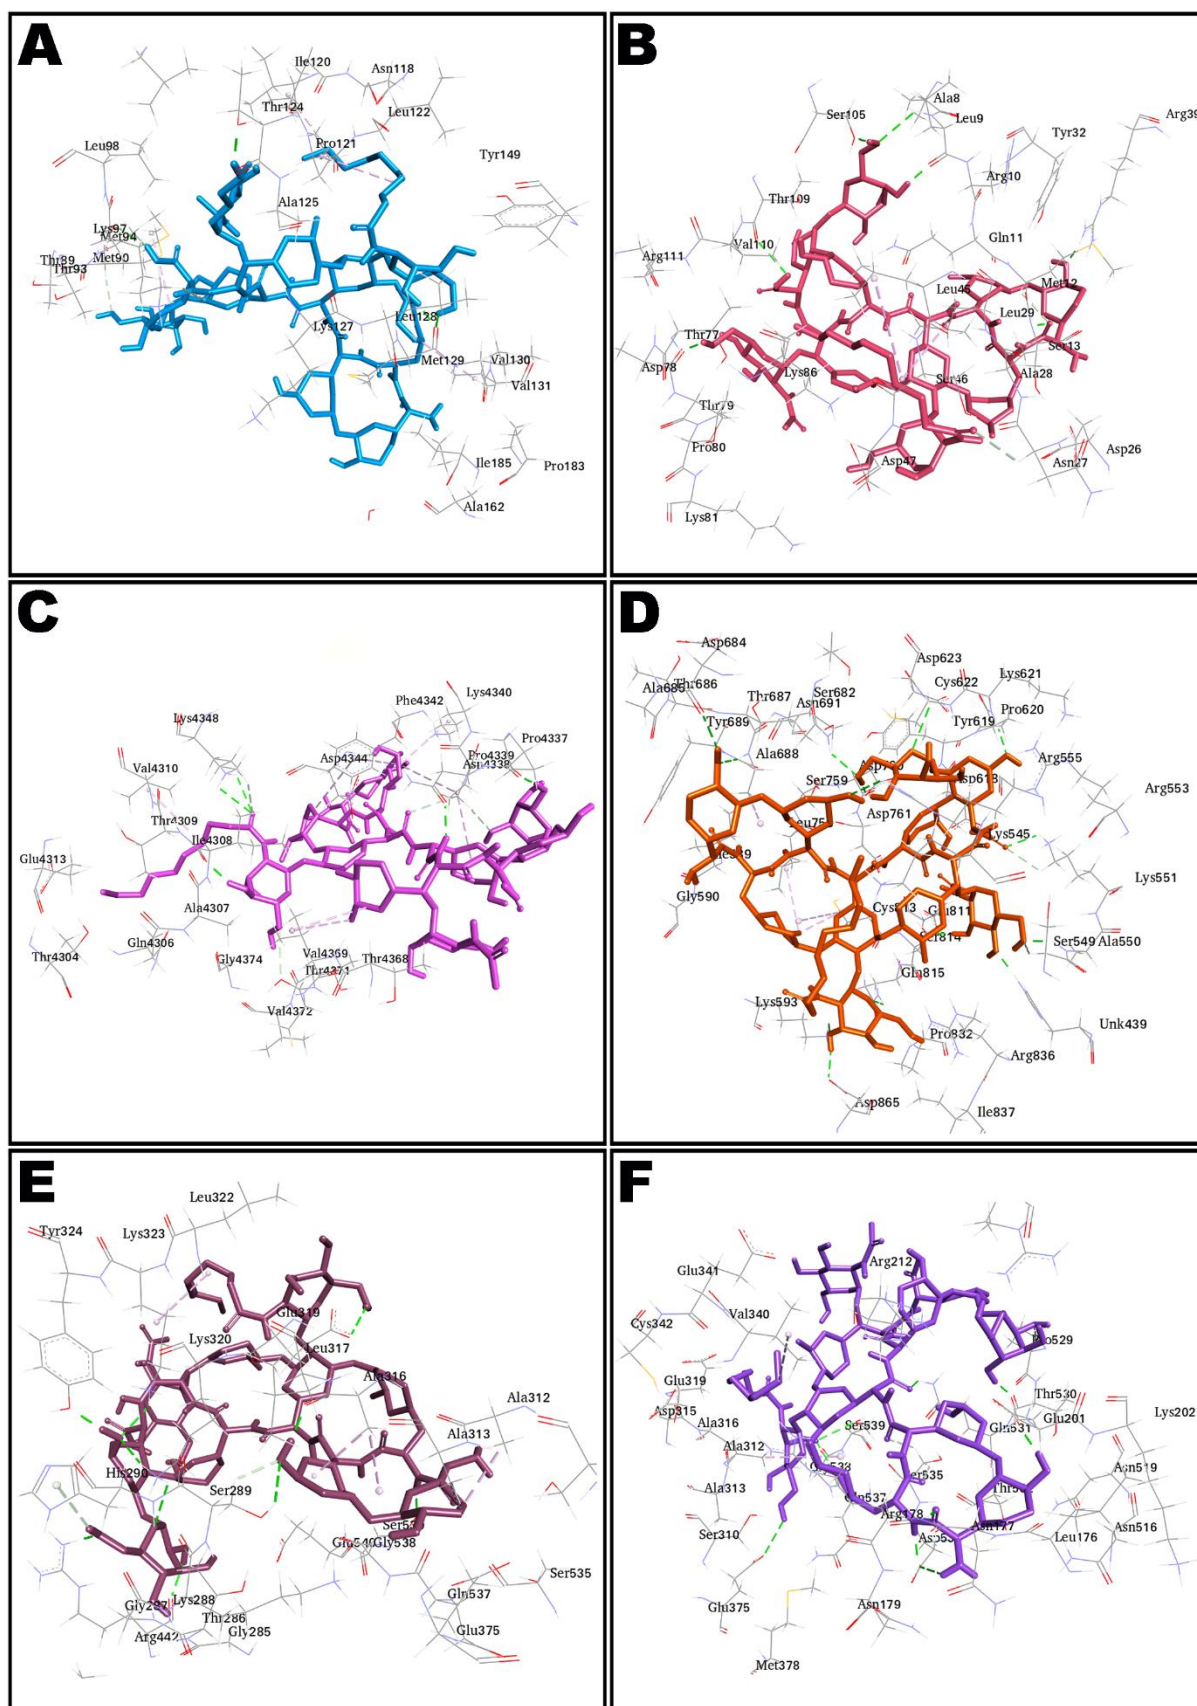

**Figure S3.** Intermolecular interactions of teicoplanin (shown in stick style) with Nsp8 (A), Nsp9 (B), Nsp10 (C), Nsp12 (D), Nsp13 helicase-ADP site (E), and Nsp13 helicase-NCB site (E) after MM/GBSA computations. Hydrogen bonds are represented by broken green lines and purple lines specify non-polar interactions.



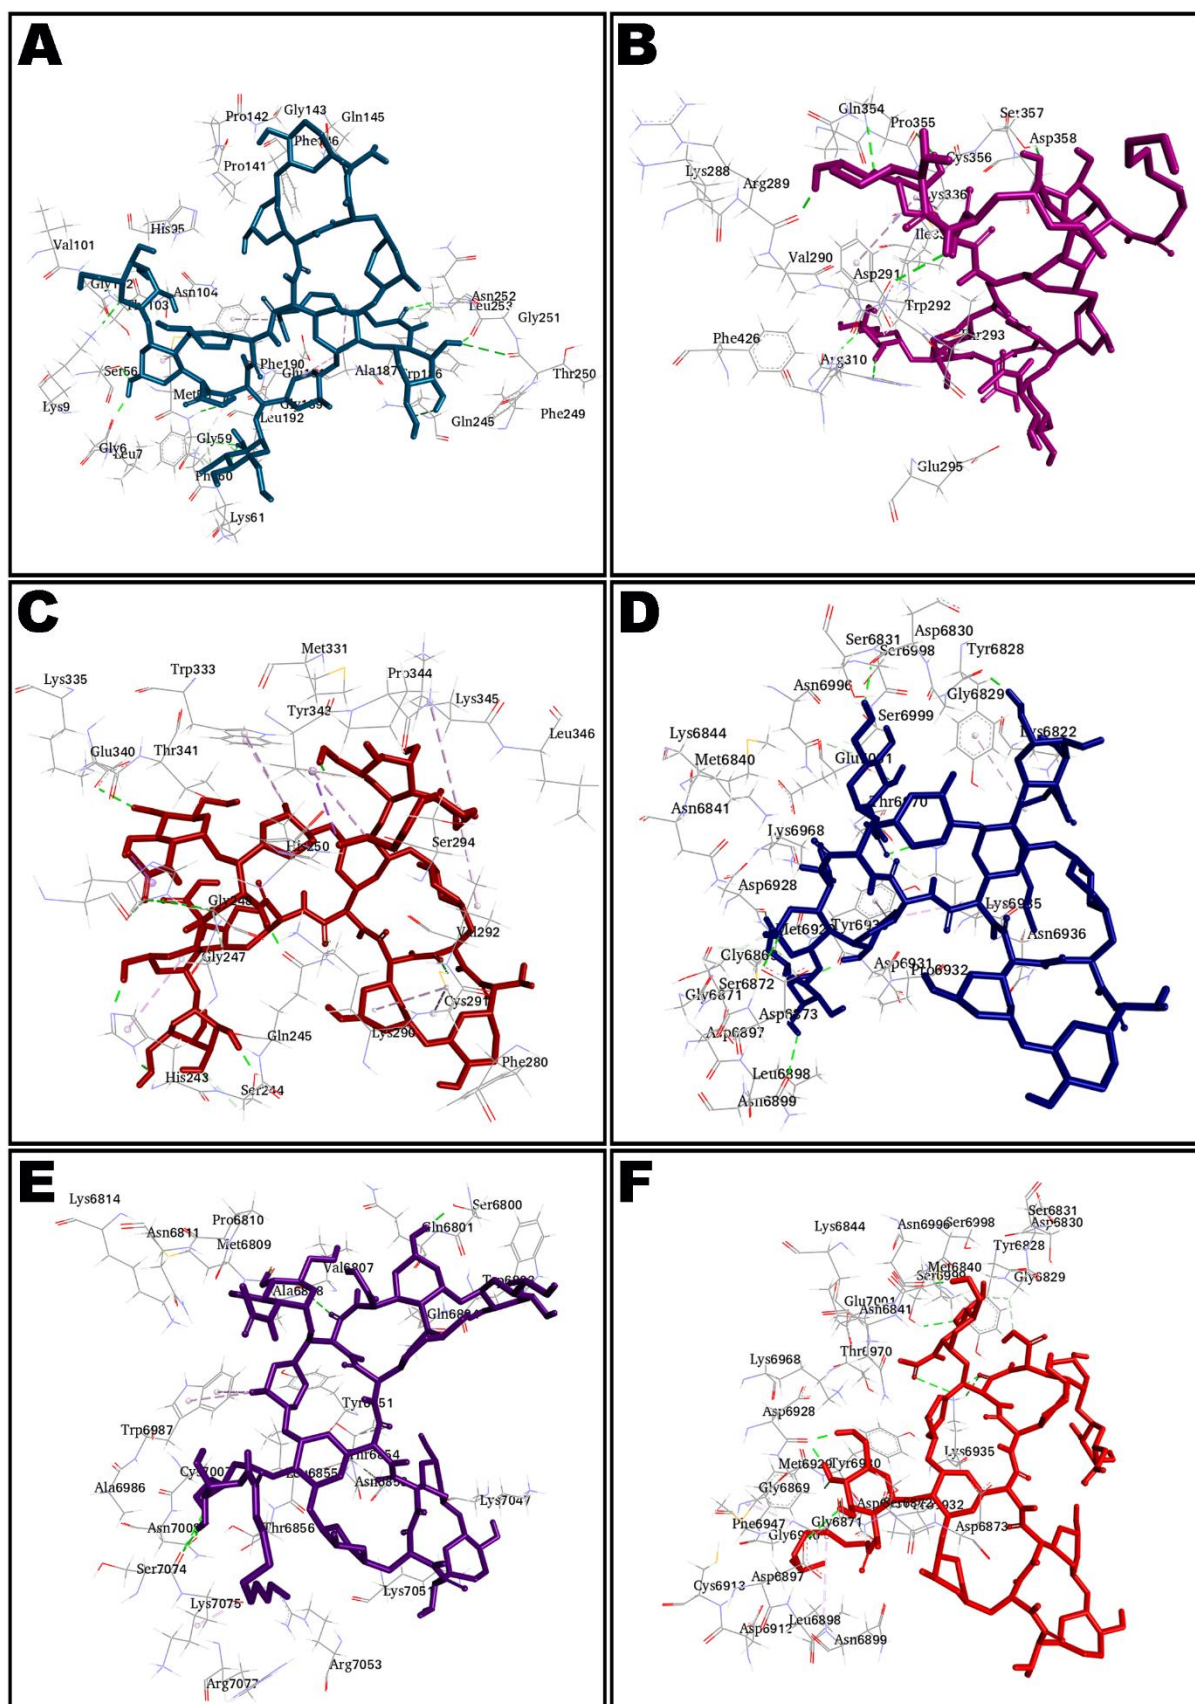

**Figure S4.** Intermolecular complexes of teicoplanin (shown as sticks) with Nsp14 N-exoribonuclease (A), Nsp14 N7-methyl transferase (B), Nsp15 exoribonuclease (C), Nsp16-GTA site (D), Nsp16-MGP site (E), and Nsp16-SAM site (E) resulted after MM-GBSA analysis showing hydrogen bonds (broken green lines) and non-polar contacts (purple lines).
